# Supplementary material
Source: MDPI journal article supplement (https://www.mdpi.com/2071-1050/14/4/2334)
Supplement: s1 [file s1 › sustainability-1538630-supplementary.pdf]

**Table S1.** Experimental design.

|         | Study 1                                                                                                           | Study 2                                                                                                    | Study 3                                                                                                                                                                                                                                          | Study 4                                                                                                |
|---------|-------------------------------------------------------------------------------------------------------------------|------------------------------------------------------------------------------------------------------------|--------------------------------------------------------------------------------------------------------------------------------------------------------------------------------------------------------------------------------------------------|--------------------------------------------------------------------------------------------------------|
| Group 1 | Incongruent background color<br>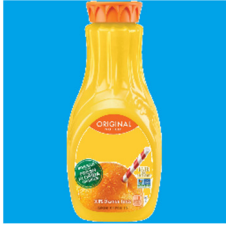 | Dynamic scent imagery<br>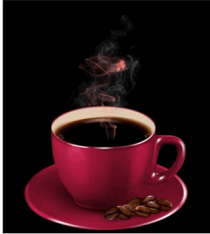 | Presence of brand jingle<br>(music available online:<br><a href="https://www.youtube.com/">https://www.youtube.com/</a> ,<br>accessed on 14 October 2011)<br>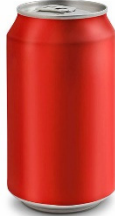 | Bundled pricing<br>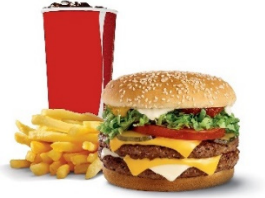 |
| Group 2 | Congruent background color<br>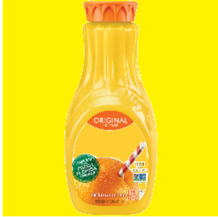   | Static scent imagery<br>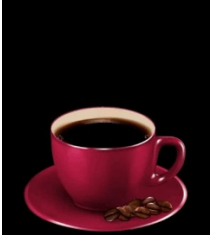  | Absence of brand jingle<br>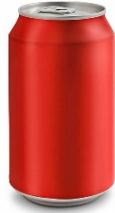                                                                                                                                   | Single pricing<br>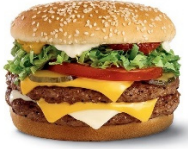  |
